# Supplementary material for: Laminarin favorably modulates gut microbiota in mice fed a high-fat diet
Source: Royal Society of Chemistry journal article supplement (doi:10.1039/c6fo00929h), 2016-01-01
Supplement: c6fo00929h2.pdf [file c6fo00929h2.pdf]

Table S1. Average number of reads and operational taxonomic units (OTUs) of 16S rDNA

| <b>Samples*</b> | <b>No. of reads<br/>(standard deviation)</b> | <b>No. of screened reads<br/>(standard deviation)</b> | <b>No. of OTUs<br/>(standard deviation)</b> |
|-----------------|----------------------------------------------|-------------------------------------------------------|---------------------------------------------|
| <b>CTL</b>      | 42,992 (7,535)                               | 35,421 (6,467)                                        | 282 (23)                                    |
| <b>HFD</b>      | 48,882 (4,504)                               | 38,212 (4,037)                                        | 188 (40)                                    |
| <b>HFL</b>      | 53,485 (32,975)                              | 43,857 (28,670)                                       | 154 (44)                                    |

*Notes:* (\*) Samples were named by sampling time (D0: Day 0, W1-6: Week 1-6), treatment (CTL: Normal diet, HFD: High-fat diet, HFL: HFD + Laminarin). 'A' and 'B' denote different cage.

Table S2. Number of differentially abundant OTUs and their read abundance during laminarin ingestion detected by comparing HFD and HFL using Metastats

| Genera                      | HFD         |              | HFL         |              |
|-----------------------------|-------------|--------------|-------------|--------------|
|                             | No. of OTUs | No. of reads | No. of OTUs | No. of reads |
| <b>Bacteroides</b>          | 0           | 0            | 4           | 22558        |
| <b>unclassified</b>         | 154         | 31403        | 60          | 12797        |
| <b>Clostridium_XIVa</b>     | 0           | 0            | 2           | 1865         |
| <b>Lactobacillus</b>        | 1           | 3            | 1           | 1775         |
| <b>Parabacteroides</b>      | 0           | 0            | 1           | 1782         |
| <b>Clostridium_XVIII</b>    | 0           | 0            | 1           | 2314         |
| <b>Asaccharobacter</b>      | 0           | 0            | 1           | 181          |
| <b>Proteus</b>              | 0           | 0            | 1           | 89           |
| <b>Enterococcus</b>         | 0           | 0            | 1           | 103          |
| <b>Allobaculum</b>          | 0           | 0            | 1           | 64           |
| <b>Eubacterium</b>          | 0           | 0            | 1           | 106          |
| <b>Blautia</b>              | 0           | 0            | 1           | 46           |
| <b>Staphylococcus</b>       | 0           | 0            | 1           | 26           |
| <b>Acinetobacter</b>        | 0           | 0            | 1           | 13           |
| <b>Streptococcus</b>        | 0           | 0            | 1           | 17           |
| <b>Johnsonella</b>          | 0           | 0            | 1           | 13           |
| <b>Legionella</b>           | 0           | 0            | 1           | 5            |
| <b>Exiguobacterium</b>      | 0           | 0            | 1           | 2            |
| <b>Hydrogenophaga</b>       | 1           | 2            | 0           | 0            |
| <b>Arcobacter</b>           | 1           | 2            | 0           | 0            |
| <b>Emticicia</b>            | 1           | 2            | 0           | 0            |
| <b>Clostridium_XIVb</b>     | 3           | 374          | 0           | 0            |
| <b>Gemella</b>              | 1           | 5            | 0           | 0            |
| <b>Oscillibacter</b>        | 5           | 871          | 0           | 0            |
| <b>Butyricicoccus</b>       | 1           | 25           | 0           | 0            |
| <b>Turicibacter</b>         | 1           | 20           | 0           | 0            |
| <b>Clostridium_IV</b>       | 1           | 34           | 0           | 0            |
| <b>Dorea</b>                | 1           | 59           | 0           | 0            |
| <b>Pseudoflavonifractor</b> | 1           | 50           | 0           | 0            |
| <b>Enterorhabdus</b>        | 1           | 132          | 0           | 0            |
| <b>Barnesiella</b>          | 1           | 183          | 0           | 0            |
| <b>Lactococcus</b>          | 1           | 1366         | 0           | 0            |
| <b>Alistipes</b>            | 1           | 266          | 0           | 0            |
| <b>Bifidobacterium</b>      | 1           | 717          | 0           | 0            |
| <b>Mucispirillum</b>        | 1           | 417          | 0           | 0            |
| <b>Odoribacter</b>          | 1           | 451          | 0           | 0            |
| <b>Clostridium_XI</b>       | 1           | 2234         | 0           | 0            |
| <b>Total</b>                | 180         | 38616        | 81          | 43756        |

Table S3. Number of differentially abundant OTUs and their read abundance after termination of laminarin ingestion detected by comparing HFD and HFL using Metastats

| <b>Genera</b>                    | <b>HFD</b>            |                     | <b>HFL</b>            |                     |
|----------------------------------|-----------------------|---------------------|-----------------------|---------------------|
|                                  | <b>Number of OTUs</b> | <b>No. of reads</b> | <b>Number of OTUs</b> | <b>No. of reads</b> |
| <b>Parabacteroides</b>           | 0                     | 0                   | 1                     | 684                 |
| <b>unclassified</b>              | 11                    | 3653                | 8                     | 1099                |
| <b>Pseudoflavonifractor</b>      | 0                     | 0                   | 1                     | 57                  |
| <b>Eubacterium</b>               | 0                     | 0                   | 1                     | 28                  |
| <b>Blautia</b>                   | 0                     | 0                   | 1                     | 7                   |
| <b>Streptococcus</b>             | 0                     | 0                   | 1                     | 5                   |
| <b>Oscillibacter</b>             | 1                     | 36                  | 0                     | 0                   |
| <b>Clostridium_sensu_stricto</b> | 1                     | 117                 | 0                     | 0                   |
| <b>Barnesiella</b>               | 1                     | 273                 | 0                     | 0                   |
| <b>Alistipes</b>                 | 1                     | 281                 | 0                     | 0                   |
| <b>Total</b>                     | 15                    | 4360                | 13                    | 1880                |
